# Supplementary material for: Protein-mediated protection as the predominant mechanism for defining processed mRNA termini in land plant chloroplasts
Source: PubMed Central journal article supplement — Nucleic Acids Res. 2011 Dec 8;40(7):3092–105. doi: 10.1093/nar/gkr1137 (PMC3326301; doi:10.1093/nar/gkr1137), 2011-12-08
Supplement: supp_gkr1137_nar-01717-v-2011-File007.pdf [file supp_gkr1137_nar-01717-v-2011-File007.pdf]

### Supplementary Figure 1.

RNA binding curve to estimate affinity of MBP-AtHCF152 for its binding site. Binding reactions were performed with an RNA oligonucleotide harboring the AtHCF152 binding site and protein at the concentrations indicated. Bound (B) and unbound (U) RNAs were separated by native gel electrophoresis. These results show that the  $K_d$  under these conditions is  $\sim 1$  nM, the concentration at which half maximal binding is observed.

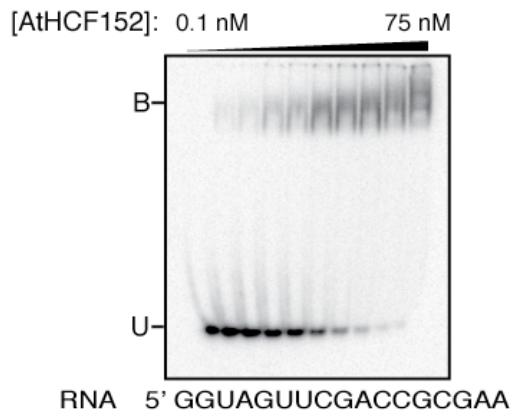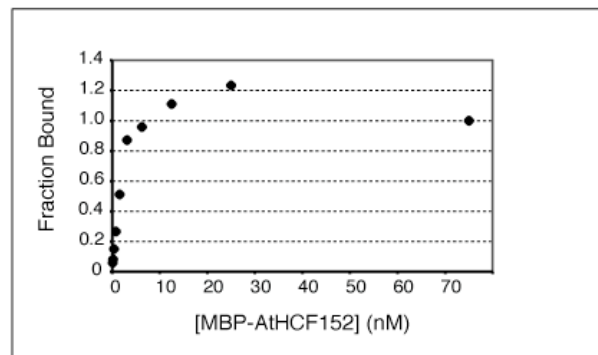

## Supplementary Figure 2.

Barley transcriptome data documenting sRNAs at sites of action of genetically-characterized PPR proteins for which binding sites have not been demonstrated. RNA termini that fail to accumulate in the absence of the indicated PPR protein are indicated. Both the annotated and newly proposed start codon for *ndhB* are shown. The processed *ndhB* 5'-ends are heterogeneous; the most upstream end was arbitrarily labeled as the 5'-end. *rps7* 3'-ends were mapped by 3'-RACE and are annotated with the number of clones representing each position.

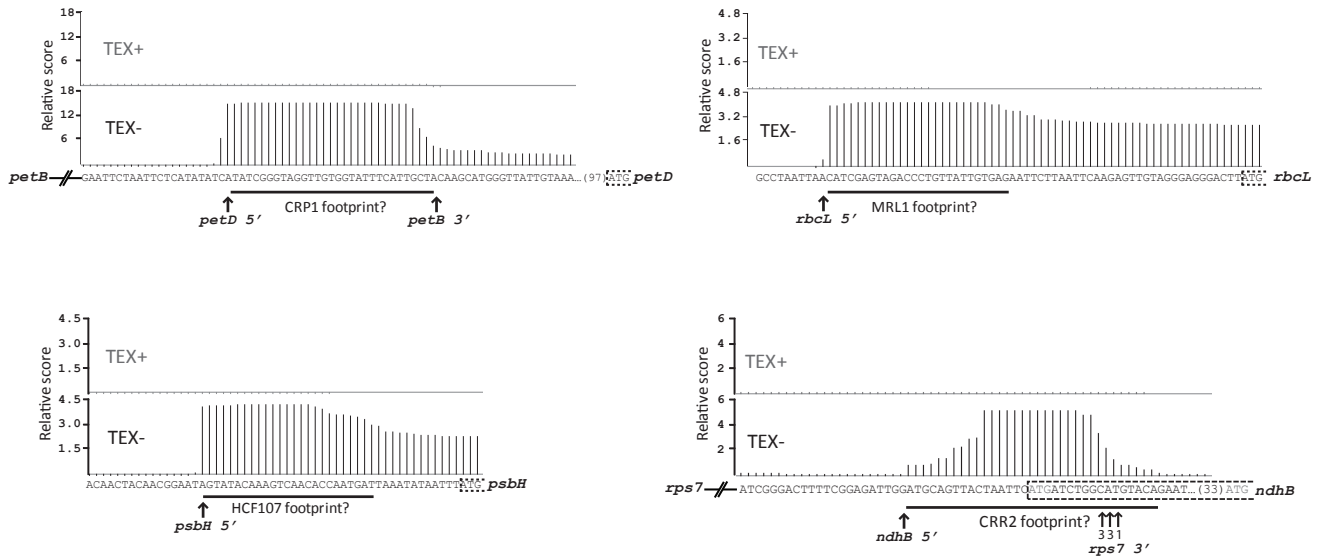

### Supplementary Figure 3.

Supporting data for sRNAs that correlate with processed 5'-termini and summarized in Table 2. The aligned sequences come from barley (Hv), maize (Zm), rice (Os), poplar (Pa), Arabidopsis (At), and tobacco (Nt). The most stable secondary structure predicted by Mfold is shown for each sRNA. 3'-termini in several of the regions depicted were mapped by 3'-RACE; these are marked by vertical arrows under the sequence histograms, annotated with the number of clones representing each position.

(A) sRNAs mapping in 5'-UTRs.

(B) sRNAs matching processed 5'-termini that map within upstream open reading frames.

Sequence alignments are not shown because these sequences are subject to additional constraints. The secondary structures of the *psbC* and *ndhK* 5'-UTRs (panels to the right) show that the sequences at the immediate 5'-end (i.e. matching the sRNA) are predicted to bind the downstream ribosome binding region if not sequestered by a protein.

(C) sRNA mapping at the 5'-end of the second of two fragments of *rps12*-intron 1.

Supplementary Figure 3A part 1

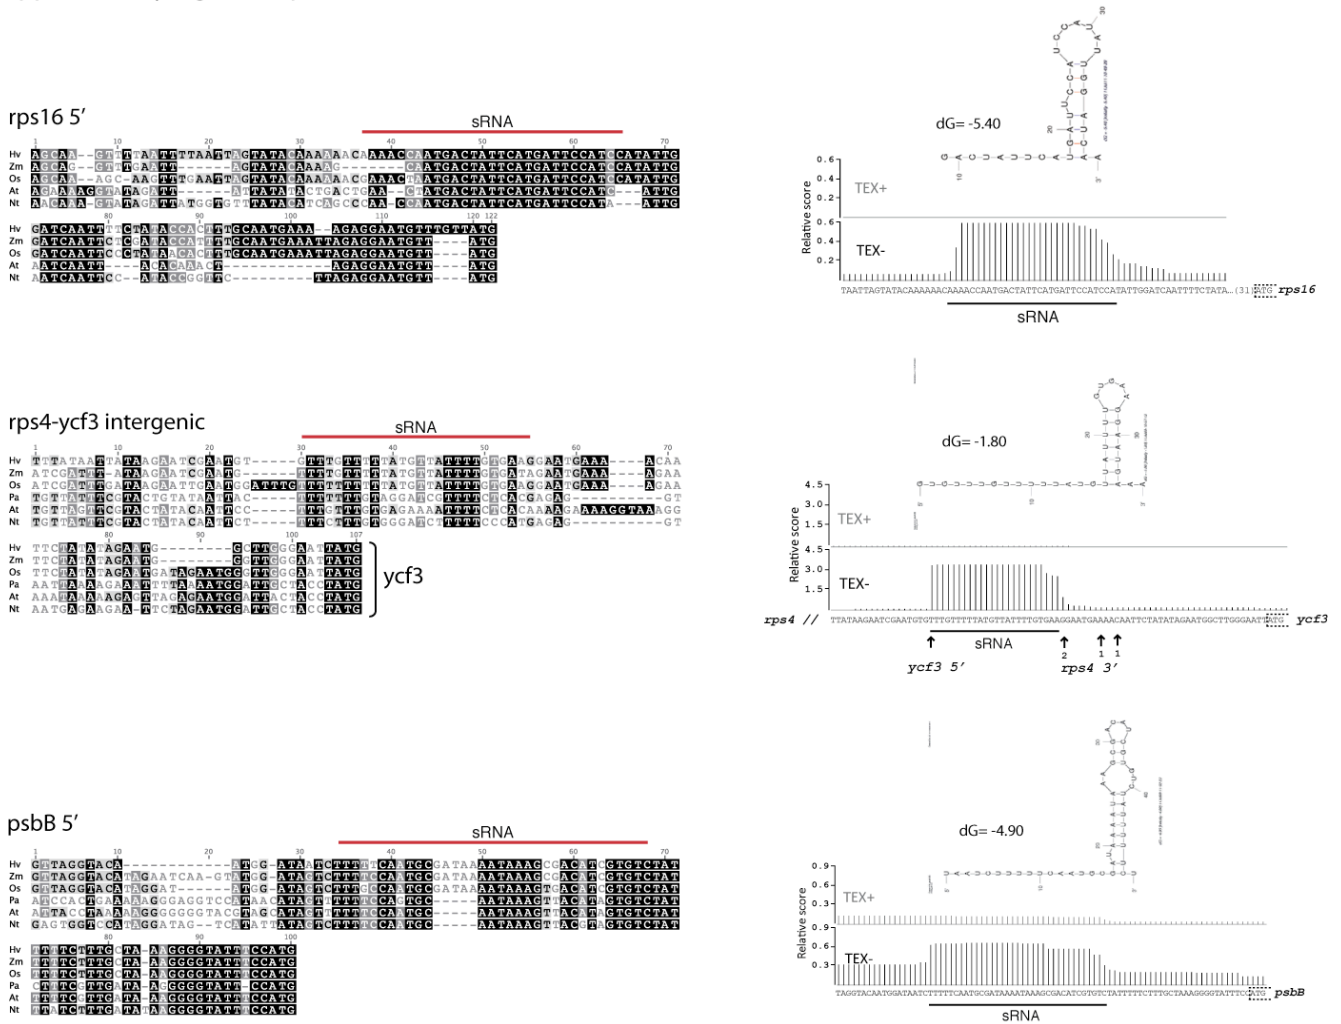





### Supplementary Figure 4.

Supporting data for sRNAs that map in 3'-UTRs and summarized in Table 3. The aligned sequences come from barley (Hv), maize (Zm), rice (Os), poplar (Pa), Arabidopsis (At), and tobacco (Nt). The most stable secondary structure predicted by Mfold is shown for each sRNA. 3'-termini mapped by 3'-RACE are marked with vertical arrows, and annotated with the number of clones corresponding to each position.

(A) sRNAs proposed to be binding sites for PPR-like proteins that stabilize 3'-termini. The Arabidopsis *ndhJ* and *ycf3* sRNAs are underlined separately because they are conserved in sequence but not position with those in barley.

(B) sRNAs mapping in 3'-UTRs for which the evidence is less strong of a role as a 3'-stabilizing element.

Supplementary Figure 4A part 1

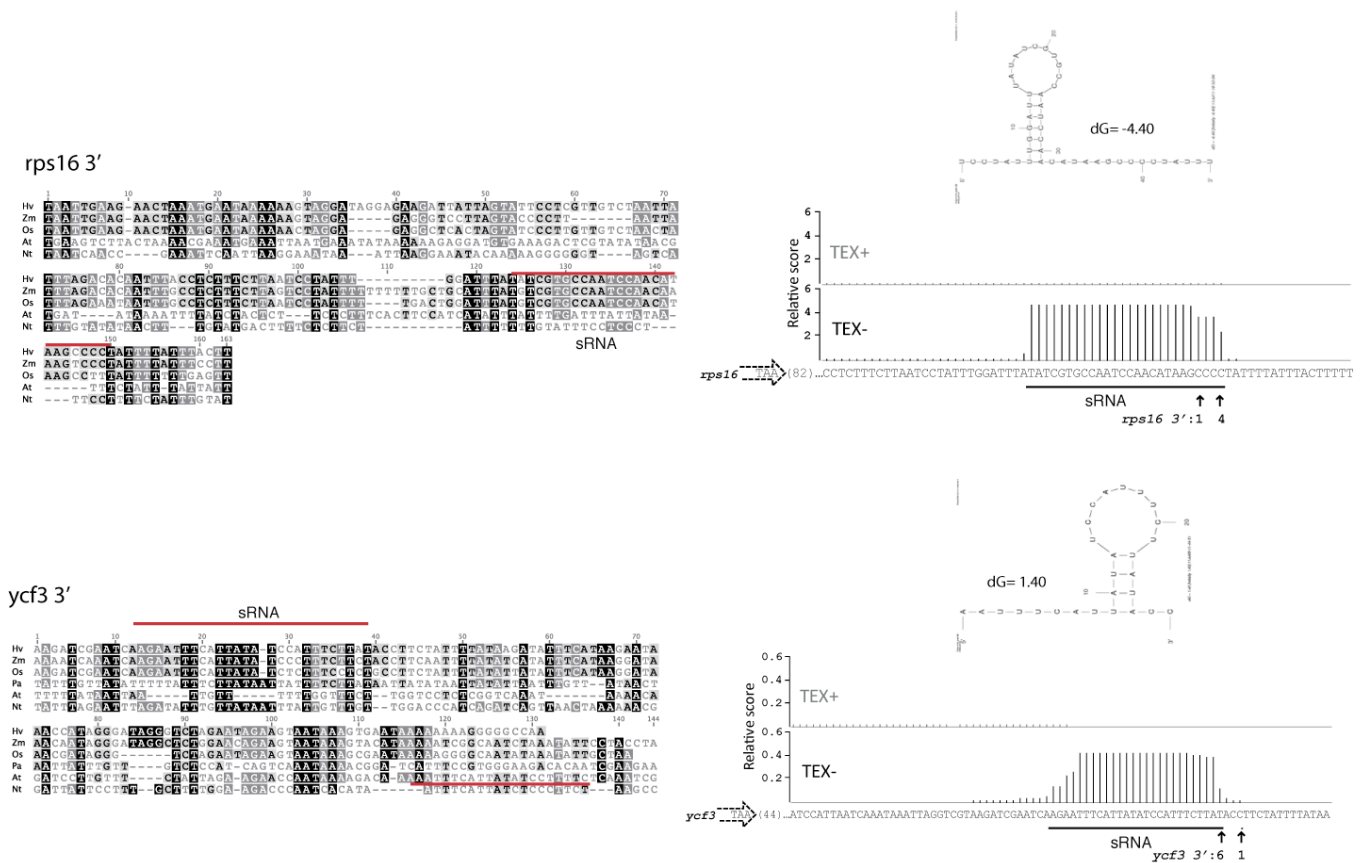

Supplementary Figure 4A part 2

ndhJ 3'

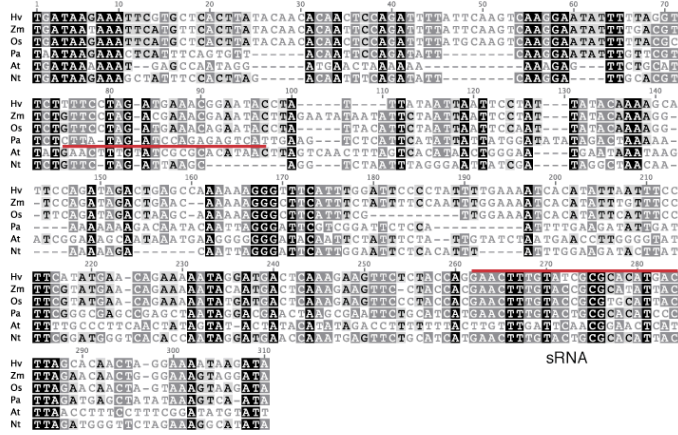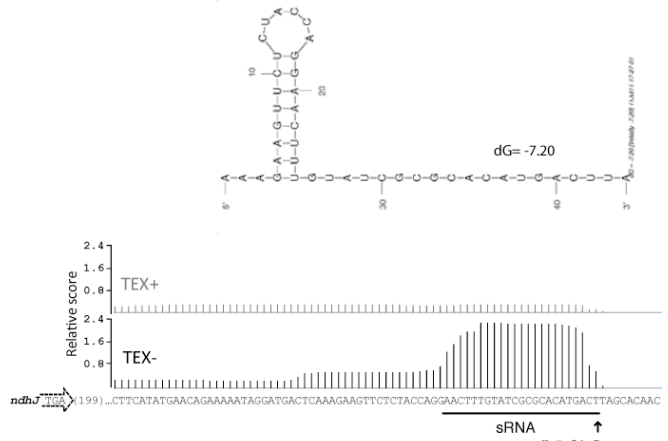

Supplementary Figure 4B

rps7 3'

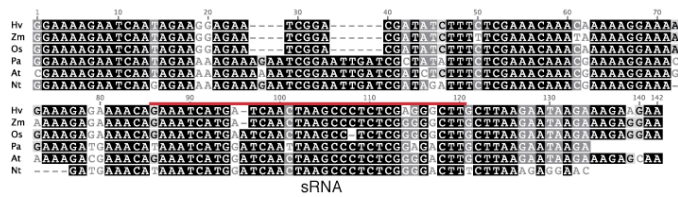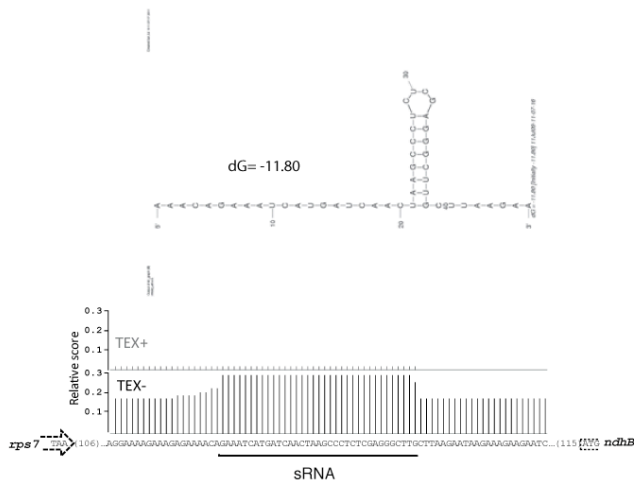

petD 3'

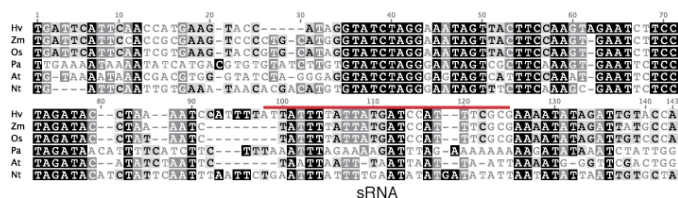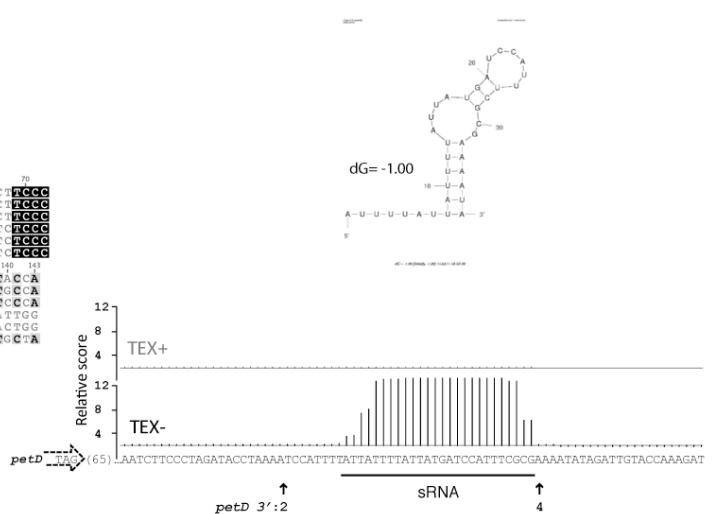

## Supplementary Figure 5.

Supporting data for sRNAs that map near transcription start sites (summarized in Table 4). Alignments and RNA structure analyses are as described for Supplementary Figure 4.

Supplementary Figure 5

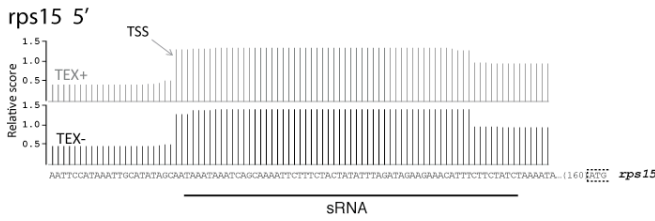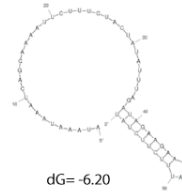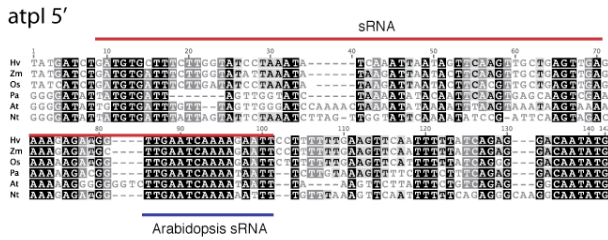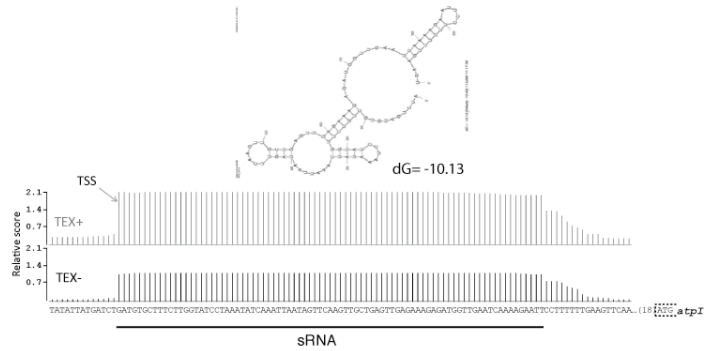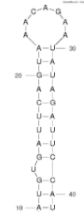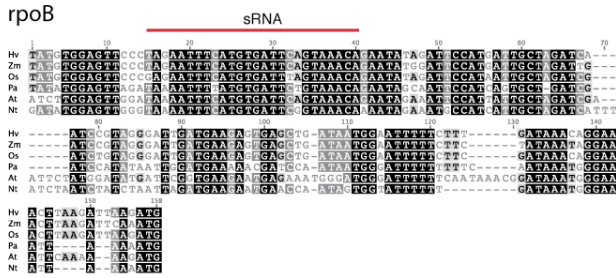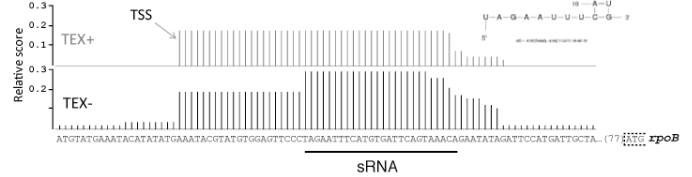



**Supplementary Table 1. Ends mapped by circular RT-PCR (cRT-PCR) and primer extension (PE) in *Zea mays*.**

| genes           | Primer                          | Primer sequence                                                                             | 5'end                                   | 3'end                                   | clones <sup>1</sup> |
|-----------------|---------------------------------|---------------------------------------------------------------------------------------------|-----------------------------------------|-----------------------------------------|---------------------|
| psbK<br>cRT-PCR | psbK_FP<br>psbK_RP              | 5' GGATGTTATGCCTGTCATACCTGTACTC 3'<br>5' GGCGAAGAAAAAGCTAGTCGGACAAAG 3'                     | (6989)-<br>TGATCATTACATGGA <u>ATT</u>   | (7428)-<br>CCAAAAAAAAAAAAATG <u>GAT</u> | 9                   |
| psbB<br>cRT-PCR | psbB_FP<br>psbB_RP              | 5' CAGACTTGGATGCTCAAGTGAATTTGG 3'<br>5' GCATTATATGCACCGAAAGCAATCGACC 3'                     | (70648)-<br>TTCCAATGCGATA <u>AAA</u>    | (72363)-<br>GGTGTGGAAGTTATA <u>AATT</u> | 8                   |
| atpI<br>cRT-PCR | atpI_FP<br>atpI_RP              | 5' TGCAACGTTAGCCGCAGCCTATATAG 3'<br>5' GTGTTGCCCTACTTCTACACCCGAT 3'                         | (32702)-<br>GATGTGATTTCTTGG <u>TAT</u>  | (33730)-<br>TATATGCATTCAGGGGGG          | 7                   |
| psbC<br>cRT-PCR | psbC_FP<br>psbC_RP              | 5' ATGCAGGAAGAGCCCGAGCTGCT 3'<br>5' TGGTTTCTTGGTCACGACCAGCTAA 3'                            | (10074)-<br>CAGCTCAGGATCAGC <u>CTC</u>  | (11565)-<br>CCATCTAGCCGAGC <u>CATT</u>  | 10                  |
| ndhA<br>cRT-PCR | ndhA_FP<br>ndhA_RP              | 5' CCCAGGATGAGAATGGATCAGTTATTAA 3'<br>5' GGGTAGAATCCATATAAGTCCGTAGATT 3'                    | (116524)-<br>AAATTGGCTGATATC <u>ATG</u> | (114292)-<br>AGAGAAAGAAACAT <u>ACC</u>  | 10                  |
| clpP<br>cRT-PCR | clpP_FP1<br>clpP_FP2<br>clpP_RP | 5' CGCGAAATGATCACAAGGGTT 3'<br>5' GAAGACATGGAAAGGGATGTTT 3'<br>5' CGCAACGAATCTCTTGACCTAA 3' | Described in Figure 1                   |                                         |                     |
| rps12<br>PE     | Rps12_RP                        | 5' CCTTAAGCGCGGCCGATTTTCTAGC 3'                                                             |                                         |                                         |                     |

<sup>1</sup> Number of clones out of 10 in which the ends mapped to the underlined 5' and 3' sequence.

**Supplementary Table 2. Primers used for 3' RACE analysis of barley chloroplast 3' termini.**

| <b>Name</b> | <b>Sequence (5'-3')</b>   | <b>Target</b> | <b>Description</b>                                       |
|-------------|---------------------------|---------------|----------------------------------------------------------|
| 3R_1        | CACCACTTCCCGTTCGACTTG     | <i>rrn16</i>  | cDNA synthesis, 1st PCR                                  |
| 3R_2        | CCGTTTCGACTTGCATGTGTTA    |               | rrn16 (linker) specific primer                           |
| PZ          | GCTGAAGCCGCTATTGGACT      | <i>ndhE</i>   | 2nd PCR rrn16 (linker) specific primer                   |
| R39         | TTGGCTAATTCGAAATCGTCTG    |               | 1st PCR target specific primer                           |
| R27         | AATTGCGGAAGCTTGGTTTG      | <i>ycf3</i>   | 2nd PCR target specific primer                           |
| R28         | GCGCTTACTCCGGGAAATTA      |               | 1st PCR target specific primer                           |
| R29         | TGATAATCATCCGCGCCTTA      | <i>ndhJ</i>   | 2nd PCR target specific primer                           |
| R30         | TTTTCTAGATGAAACGGAATACCT  |               | 1st PCR target specific primer                           |
| R31         | TTTCCTTGAAAAGGGTGCTCA     | <i>rps16</i>  | 2nd PCR target specific primer                           |
| R32         | AAGGGTGCTCAACCGACAAG      |               | 1st PCR target specific primer                           |
| R33         | GCCCAGTAGCTACGACCGTTT     | <i>petD</i>   | 2nd PCR target specific primer                           |
| R34         | TGGAGCAACACTACCCATTGA     |               | 1st PCR target specific primer                           |
| R35         | TCCTTCCGTCCCAGATTGTT      | <i>trnQ</i>   | 2nd PCR target specific primer                           |
| R36         | TGGGTTTAAATAAATTGGATCTTGG |               | 1st PCR target specific primer                           |
| R37.1       | CTCGGGGGTTCCCTAGTTCT      | <i>rps4</i>   | 2nd PCR target specific primer                           |
| R38         | TTCGTGTCCAAGCAGAAGGA      |               | 1st PCR target specific primer                           |
| R42         | TGGAAATAGCATGGAATAAGGTTTG | <i>rps7</i>   | 2nd PCR target specific primer                           |
| R43         | CCTATTCATGGGGATTCCGTA     |               | 1st PCR target specific primer                           |
| R44         | GTCAGCAGACGAAGCCAAAG      | <i>clpP</i>   | 2nd PCR target specific primer                           |
| R45         | TCCGGAAATGTTTAAGGATTGG    |               | 1st PCR target specific primer                           |
| M13_rev     | GAGCGGATAACAATTTACACAGG   | pGEM®T        | Sequencing of 3'-RACE products cloned into pGEM®T vector |
